# Supplementary material for: Structural Basis for Substrate-specific Acetylation of Nα-acetyltransferase Ard1 from Sulfolobus solfataricus
Source: PubMed Central journal article supplement (PMC5390088; doi:10.1038/srep08673), 2015-03-02
Supplement: srep08673-s1.pdf [file srep08673-s1.pdf]

## Supplementary Information

### **Structural Basis for Substrate-specific Acetylation of $\alpha$ -acetyltransferase Ard1 from *Sulfolobus solfataricus***

Yu-Yung Chang<sup>1</sup>, and Chun-Hua Hsu<sup>1,2\*</sup>

<sup>1</sup>Department of Agricultural Chemistry, National Taiwan University, Taipei 10617, Taiwan

<sup>2</sup>Center for Systems Biology; Genome and Systems Biology Degree Program, National Taiwan University, Taipei 10617, Taiwan

\*To whom correspondence should be addressed:

Chun-Hua Hsu, Department of Agricultural Chemistry, National Taiwan University, Taipei 10617, Taiwan, Tel.: (886) 2-3366-4468; Fax: (886) 2-3366-4468; E-mail: andyhsu@ntu.edu.tw

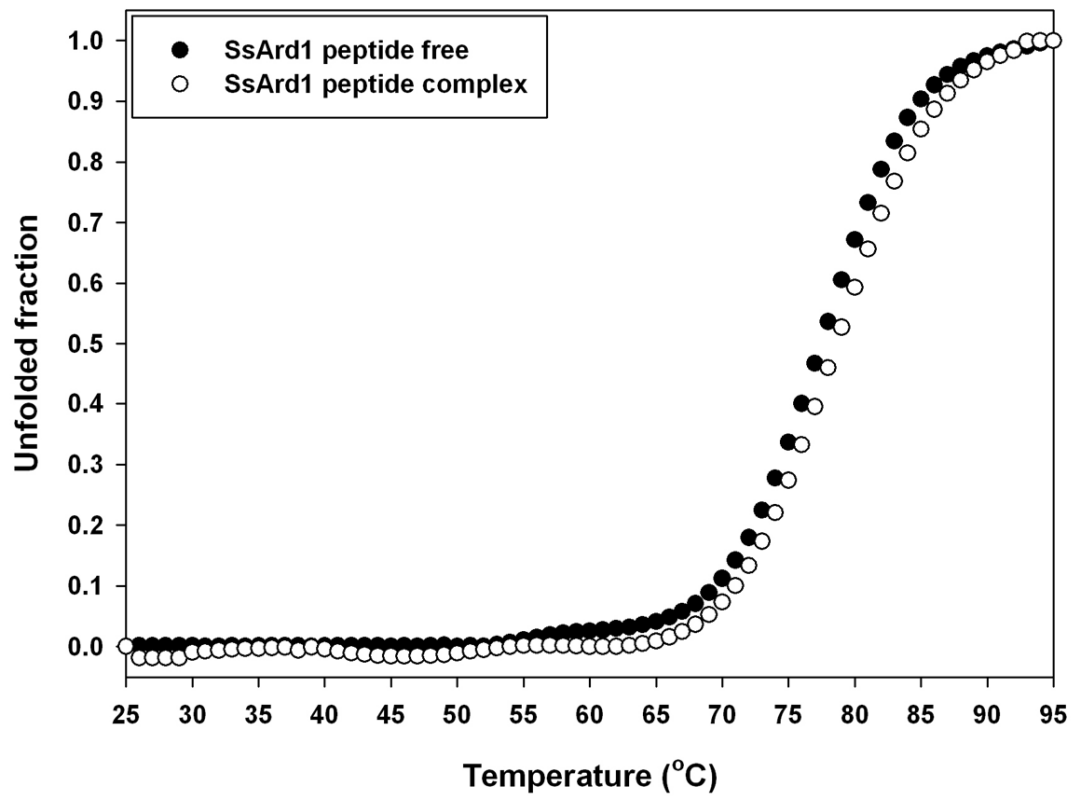

**Figure S1. Thermal stabilities of peptide-free and peptide-bound *Sulfolobus solfataricus* Ard1 (SsArd1).** The thermal unfolding was monitored by recording the circular dichroism signal at 220 nm in a scanning from 25 to 95°C, at a rate of 1°C/min.

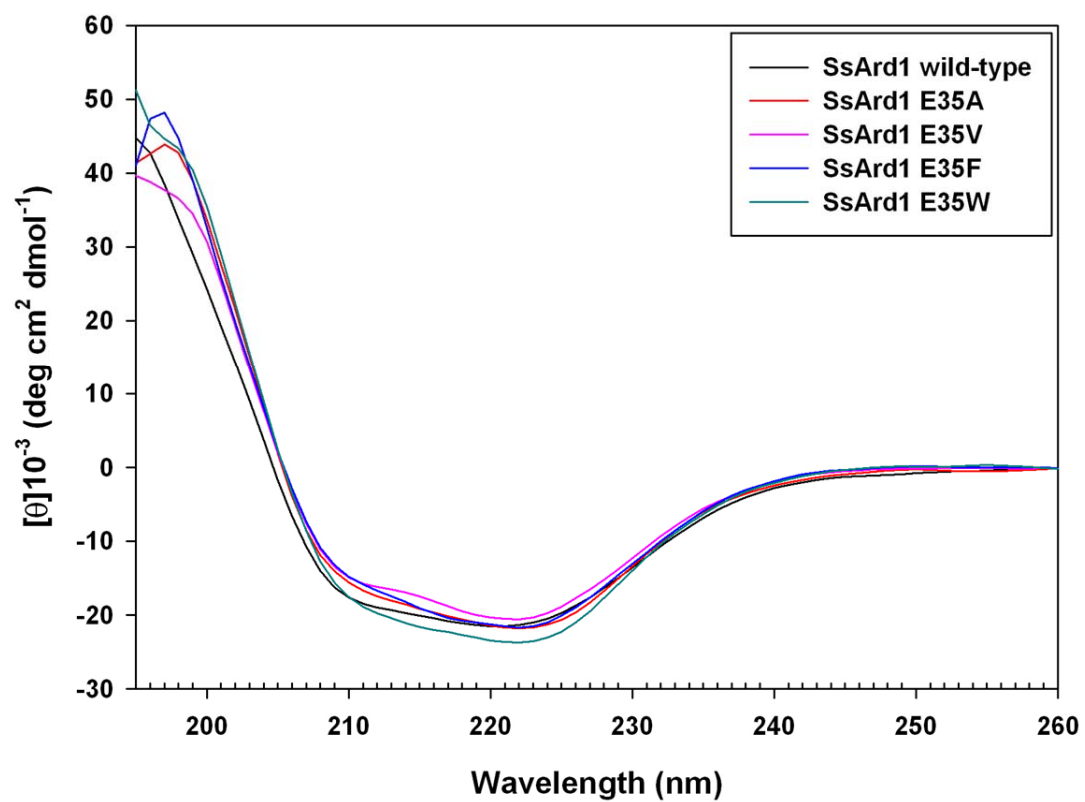

Figure S2. Far-UV circular dichroism spectra from 260 nm to 195 nm for wild-type SsArd1 and its Glu<sup>35</sup> mutants.

**Table S1 Residues of AcCoA binding motif of SsArd1 compare with that of known GNAT structures.**

|        |      |      |      |      |      |      |
|--------|------|------|------|------|------|------|
| SsArd1 | R100 | R101 | K102 | G103 | I104 | A105 |
| 3TFY   | R84  | R85  | L86  | G87  | I88  | G89  |
| 2CNS   | Q76  | R77  | R78  | G79  | L80  | G81  |
| 4KVO   | R83  | H84  | L85  | G86  | L87  | A88  |
| 2FXF   | R101 | G102 | F103 | G104 | I105 | G106 |
| 3BJ8   | R101 | G102 | F103 | G104 | I105 | G106 |
| 3TE4   | R153 | G154 | L155 | G156 | I157 | A158 |
